# Supplementary material for: Bimetallic CoMoS₄ Decorated MOF-Derived CdS: A Synergistic Heterostructure for Enhanced Photocatalytic Hydrogen Evolution
Source: Research Square preprint supplement (doi:10.21203/rs.3.rs-8647075/v1), 2026-01-30
Supplement: Supplementary file 1 [file b2a39c18d8e39f3d50ad45ea.docx]

**Bimetallic CoMoS₄ Decorated MOF-Derived CdS: A Synergistic Heterostructure for Enhanced Photocatalytic Hydrogen Evolution**

*Irem Firtina-Ertisa**

*a Department of Chemical Engineering, Faculty of Engineering, Gebze Technical University, Gebze, Kocaeli, Turkey*

**Table S1.**  BET surface area of CdM, CdS, OMS5 and OMS10 samples

| Catalyst | SBET (m2/g) | Catalyst | SBET (m2/g) |
| --- | --- | --- | --- |
| CdM | 41.56 | **OMS5** | 154.98 |
| CdS | 19.73 | **OMS10** | 120.55 |


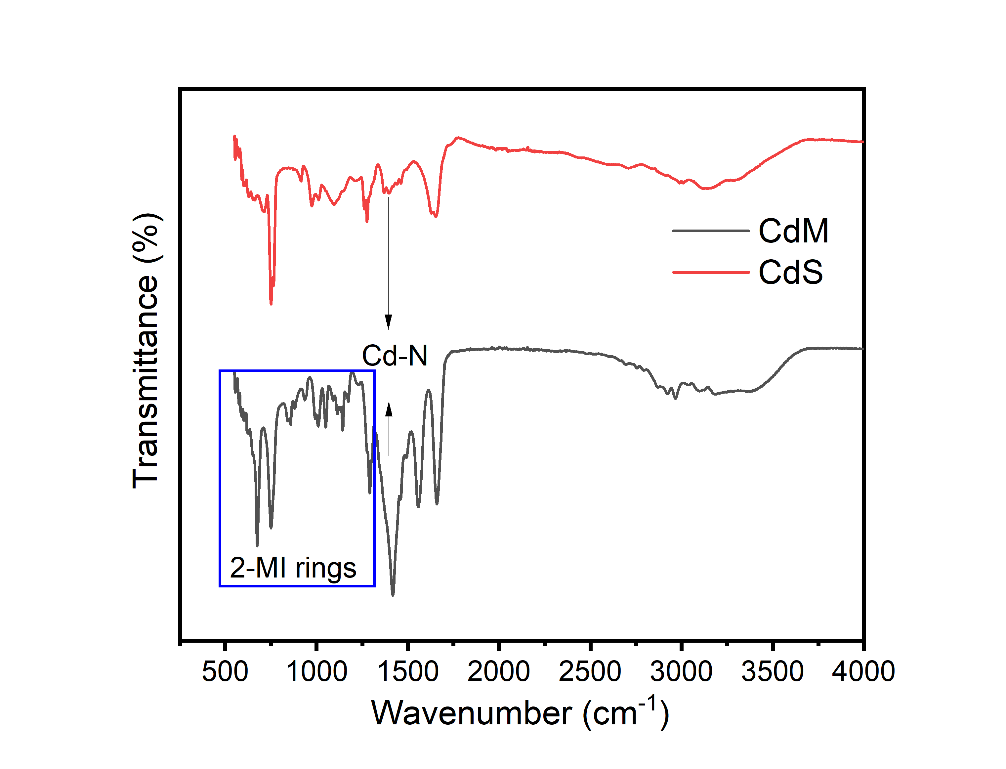


**Fig. S1**. FT-IR spectra of CdM and CdS samples

**Table S2.** Band gap values of the samples

| Catalyst | Band Gap (eV) | Catalyst | Band Gap (eV) |
| --- | --- | --- | --- |
| CdM | 2.76 | **OMS2.5** | 2.26 |
| CdS | 2.38 | **OMS5** | 2.36 |
| OMS | 1.53 | **OMS10** | 2.32 |

**Table S3.** Comparison of hydrogen evolution performances of CdS based catalysts

| Photocatalysts | Incident Light | Sacrificial agent | H2 Production Rate (mmol g-1 h-1) | Reference |
| --- | --- | --- | --- | --- |
| (MOF derived) CdS/MoS2 | 300 W Xe | Na2S, Na2SO3 | 3.318 | [1] |
| (MOF derived)  CdS/MoS2 | 300 W Xe | Na2S, Na2SO3 | 5.586 | [2] |
| CoMoS4/CdS | 300 W Xe | 10% Lactic acid | 0.214 | [3] |
| Cu2MoS4/CdS | 150 W Xe | 20% Lactic acid | 15.56 | [4] |
| CoMoS4/CdS | 300 W Xe | Benzyl alcohol | 2.86 | [5] |
| (MOF derived)  CoMoS4/CdS (OMS2.5) | 300 W Halogen | 6 % TEOA | 5.8 | This Work |

**Fig. S2.** Recyclability tests of the photocatalytic H2 production over the catalysts

**References**

[1] S. Liu, Y. Yang, W. Xiao, S. Xia, C. Jin, W. Wang, S. Li, M. Zhong, S. Wang, C. Chen, Metal-organic frameworks derived porous MoS2/CdS heterostructure for efficient photocatalytic performance towards hydrogen evolution and organic pollutants, International Journal of Hydrogen Energy 48 (2023) 32729–32738. https://doi.org/10.1016/j.ijhydene.2023.05.050.

[2] L. Lin, S. Huang, Y. Zhu, B. Du, Z. Zhang, C. Chen, X. Wang, N. Zhang, Construction of CdS/MoS 2 heterojunction from core-shell MoS 2 @Cd-MOF for efficient photocatalytic hydrogen evolution, Dalton Transactions 48 (2019) 2715–2721. https://doi.org/10.1039/c8dt04745f.

[3] Q. Li, X.Q. Qiao, Y. Jia, D. Hou, D.S. Li, Amorphous CoMoS4 Nanostructure for Photocatalytic H2 Generation, Nitrophenol Reduction, and Methylene Blue Adsorption, ACS Applied Nano Materials 3 (2020) 68–76. https://doi.org/10.1021/acsanm.9b01582.

[4] S. Hong, D.P. Kumar, D.A. Reddy, J. Choi, T.K. Kim, Excellent photocatalytic hydrogen production over CdS nanorods via using noble metal-free copper molybdenum sulfide (Cu 2 MoS 4 ) nanosheets as co-catalysts, Applied Surface Science 396 (2017) 421–429. https://doi.org/10.1016/j.apsusc.2016.10.171.

[5] C. Li, S. Du, C. Lu, K. Ren, Q. Wang, S. Shan, Q. Li, Z. Fang, X. Li, W. Dou, Bimetallic MMoS4 (M = Ni, Co, Cu) cocatalysts architected CdS nanoflowers for synergistically boosting visible-light-driven photocatalytic H2 evolution from water and benzyl alcohol, Journal of Alloys and Compounds 924 (2022) 166645. https://doi.org/10.1016/j.jallcom.2022.166645.
